# Supplementary material for: Fabrication of boron nitride nanosheet/polymer composites with tunable thermal insulating properties
Source: Royal Society of Chemistry journal article supplement (doi:10.1039/c8nj06236f), 2019-01-01
Supplement: c8nj06236f1.pdf [file c8nj06236f1.pdf]

## Supporting Information

### **Fabrication of boron nitride nanosheet/polymer composites with tunable thermal insulating property**

*Jianyun He, Shijun Liu, Yunqi Li, Shangjing Zeng, Yanlong Qi, Long Cui, Quanquan Dai,\* and Chenxi Bai\**

# NMR spectrum of representative polymer

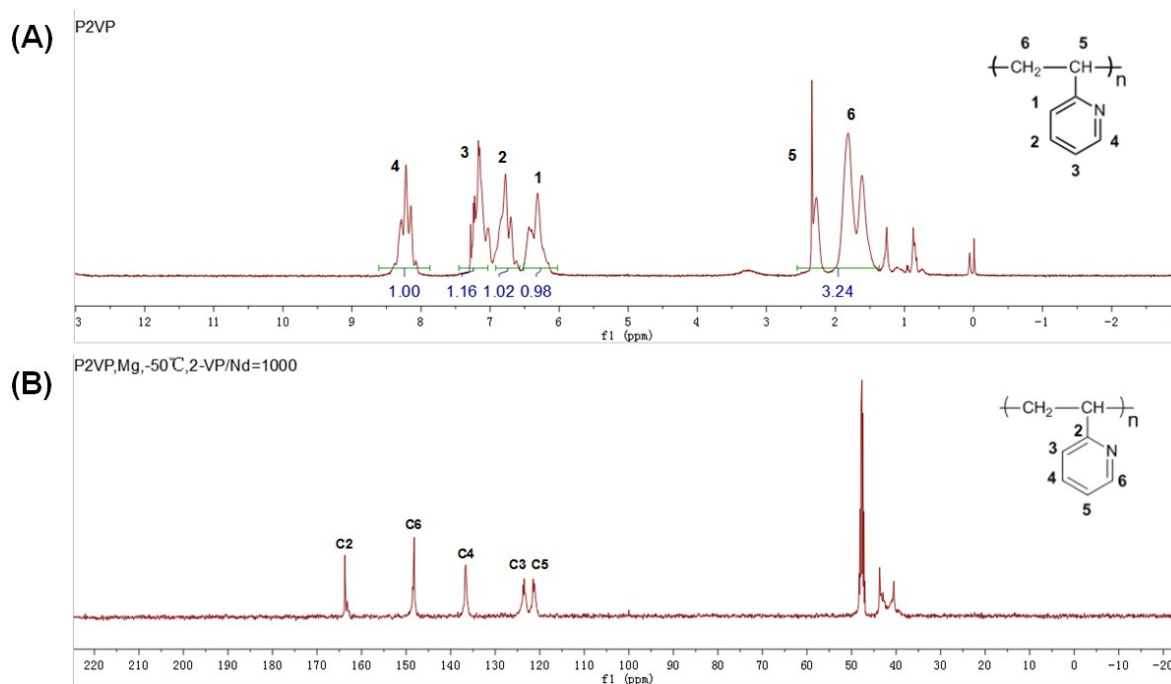

**Figure S1.** (A)  $^1\text{H}$  NMR spectrum of P2VP in  $\text{CDCl}_3$ ; (B)  $^{13}\text{C}$  NMR spectrum of P2VP in  $\text{CDOD}_3\text{-d}_4$ .
